# Supplementary material
Source: publisher figshare collection journal article supplement (https://tandf.figshare.com/ndownloader/files/22393617)
Supplement: Supplementary file 1 [file 22393617]

**Temperature dependent electrical and optical properties with higher photosensitivity of Cu2Se absorber thin films for photo voltaic application**

 J. Henry1, T. Daniel1, V. Balasubramanian1, K. Mohanraj1,*and G. Sivakumar2

1Department of Physics, Manonmaniam Sundaranar University, Tirunelveli-627 012, Tamil Nadu, India

2Centralised Instrumentation and Service Laboratory, Department of Physics, Annamalai University, Annamalai Nagar-608 002, Tamil Nadu, India

*Corresponding author e-mail: [kmohanraj.msu@gmail.com](mailto:kmohanraj.msu@gmail.com); [mohanraj@msuniv.ac.in](mailto:mohanraj@msuniv.ac.in)

Phone number: +91-9788083079;


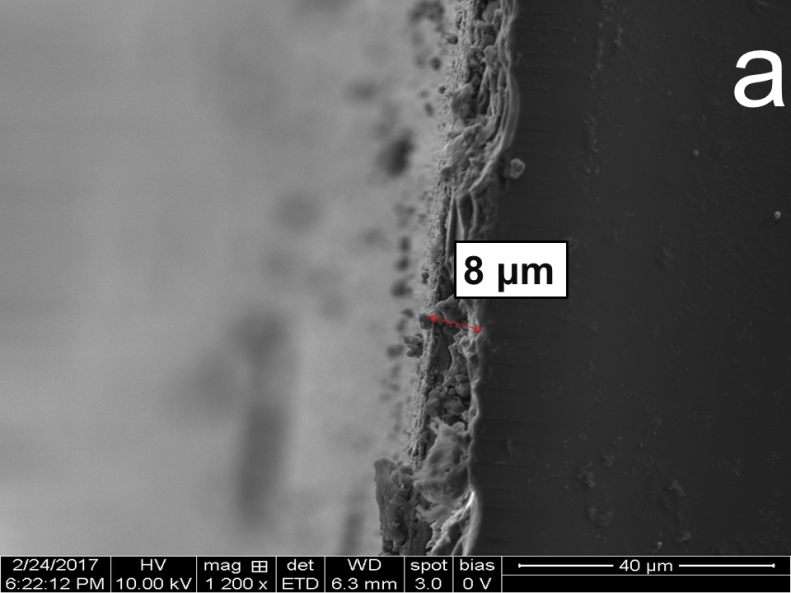

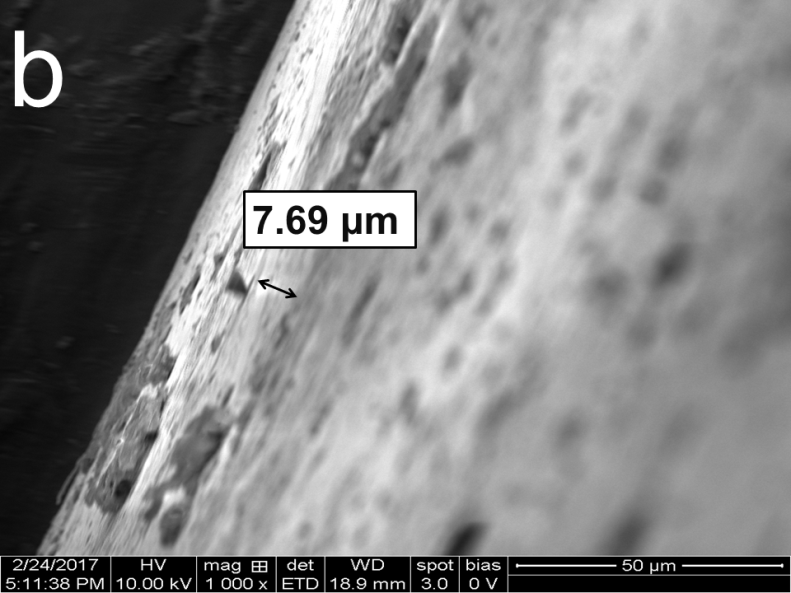


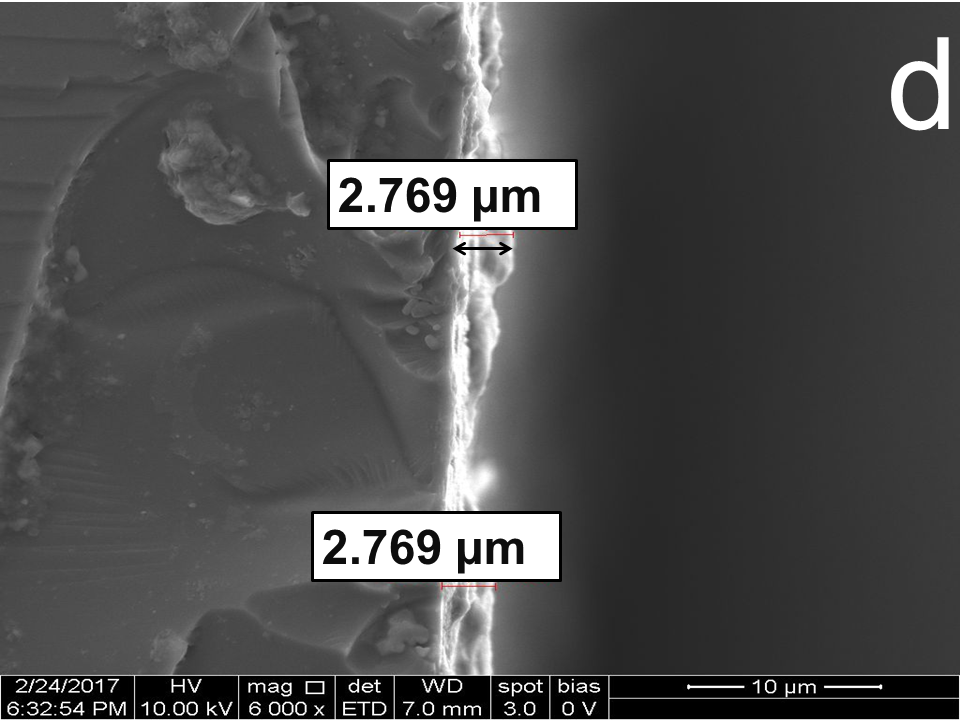

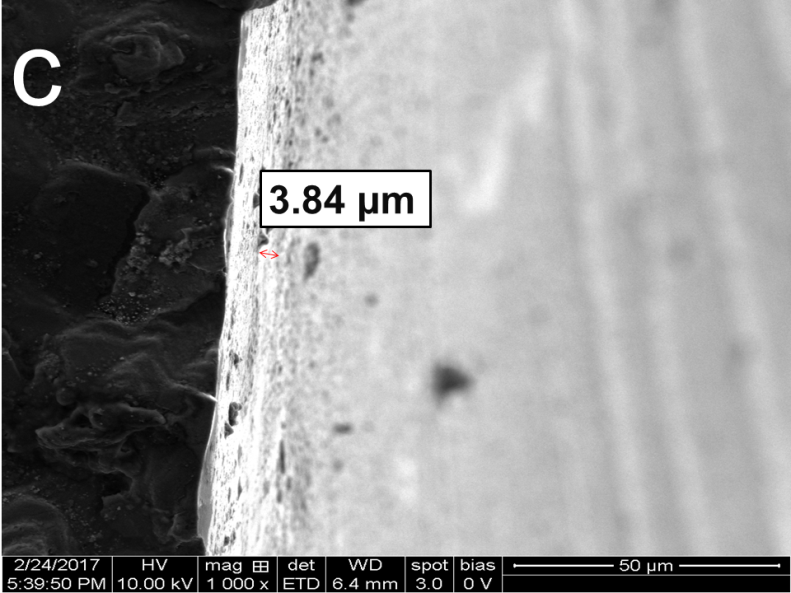


**Figure S1. FESEM cross sectional images Cu2Se thin film**
